# Supplementary material for: Biochemical and Thermodynamic Studies on a Novel Thermotolerant GH10 Xylanase from Bacillus safensis
Source: MDPI journal article supplement (doi:10.3390/biom12060790), 2022-06-06
Supplement: s1 [file s1]

## Supplementary Figure S1

*B. safensis* ATHUBA63 16S rDNA [Accession Number: ON430671]

GACGAACGCTGGCGGCGTGCCTAATACATGCAAGTCGAGCGGACAGAAGGGAGCTTGCTCCCGGATGTTAGCGGC  
GGACGGGTGAGTAACACGTGGGTAACTGCCTGTAAGACTGGGATAACTCCGGGAAACCGGAGCTAATACCGGAT  
AGTTCCTTGAACCGCATGGTTCAAGGATGAAAGACGGTTTCGGCTGTCACTTACAGATGGACCCGCGGCGCATTAG  
CTAGTTGGTGGGGTAATGGCTACCAAGGCGACGATGCGTAGCCGACCTGAGAGGGTGATCGGCCACACTGGGAC  
TGAGACACGGCCAGACTCCTACGGGAGGCAGCAGTAGGGAATCTTCCGCAATGGACGAAAGTCTGACGGAGCA  
ACGCCGCGTGAGTGATGAAGGTTTTTCGGATCGTAAAGCTCTGTTGTTAGGGAAGAACAAGTGCGAGAGTAACTGC  
TCGCACCTTGACGGTACCTAACCAGAAAGCCACGGCTAACTACGTGCCAGCAGCCGCGGTAATACGTAGGTGGCA  
AGCGTTGTCCGGAATTATTGGGCGTAAAGGGCTCGCAGGCGGTTTCTTAAGTCTGATGTGAAAGCCCCCGGCTCAA  
CCGGGGAGGGTCATTGGAAACTGGGAACTTGAGTGCAGAAGAGGAGAGTGGAATTCCACGTGTAGCGGTGAAA  
TGGGTAGAGATGTGGAGGAACACAGTGCGGAAGGCGACTCTCTGGTCTGTAAGTACGCTGAGGAGCGAAAGCG  
TGGGGAGCGAACAGGATTAGATACCCTGGTAGTCCACGCGTAAACGATGAGTGCTAAGTGTAGGGGGTTTCCG  
CCCCTTAGTGCTGCAGCTAACGCATTAAGCACTCCGCGCTGGGGAGTACGGTCGCAAGACTGAAACTCAAAGGAAT  
TGACGGGGGCGCACAAAGCGGTGGAGCATGTGGTTTAATTCGAAGCAACGCGAAGAACCTTACCAGGTCTTGAC  
ATCCTCTGACAACCCTAGAGATAGGGCTTTCCCTTCGGGGACAGAGTGACAGGTGGTGCATGGTTGTCGTAGCTC  
GTGTCGTGAGATGTTGGGTAAAGTCCCGCAACGAGCGCAACCCTTGATCTTAGTTGCCAGCATTCAAGTTGGGCACT  
CTAAGGTGACTGCCGGTGACAAACCGGAGGAAGGTGGGGATGACGTCAAATCATCATGCCCTTATGACCTGGGC  
TACACACGTGCTACAATGGACAGAACAAAGGGCTGCAAGACCGCAAGGTTTAGCCAATCCCATAAATCTGTTCTC  
AGTTCGGATCGCAGTCTGCAACTCGACTGCGTGAAGCTGGAATCGCTAGTAATCGCGGATCAGCATGCCGCGGTG  
AATACGTTCCCGGGCCTTGTACACACCGCCGTCACACCACGAGAGTTTGCAACACCCGAAGTCGGTGAGGTAAC  
CTTTATGGAGCCAGCCGCCGAAGGTGGGGCAGATGATTGGGGTGAAG

Sequences producing significant alignments

Download

Select columns

Show

100

☒ select all 100 sequences selected

[GenBank](#)

[Graphics](#)

[Distance tree of results](#)

[MSA Viewer](#)

|                                     | Description                                                                                     | Scientific Name                             | Max Score | Total Score | Query Cover | E value | Per. Ident | Acc. Len | Accession                   |
|-------------------------------------|-------------------------------------------------------------------------------------------------|---------------------------------------------|-----------|-------------|-------------|---------|------------|----------|-----------------------------|
| <input checked="" type="checkbox"/> | <a href="#">Bacillus safensis strain NBRC 100820 16S ribosomal RNA, partial sequence</a>        | <a href="#">Bacillus safensis</a>           | 2723      | 2723        | 100%        | 0.0     | 100.00%    | 1474     | <a href="#">NR_113945.1</a> |
| <input checked="" type="checkbox"/> | <a href="#">Bacillus australimaris strain MCCC 1A05787 16S ribosomal RNA, partial sequence</a>  | <a href="#">Bacillus australimaris</a>      | 2712      | 2712        | 100%        | 0.0     | 99.86%     | 1513     | <a href="#">NR_148787.1</a> |
| <input checked="" type="checkbox"/> | <a href="#">Bacillus pumilus strain NBRC 12092 16S ribosomal RNA, partial sequence</a>          | <a href="#">Bacillus pumilus</a>            | 2712      | 2712        | 100%        | 0.0     | 99.86%     | 1474     | <a href="#">NR_112637.1</a> |
| <input checked="" type="checkbox"/> | <a href="#">Bacillus zhangzhouensis strain MCCC 1A08372 16S ribosomal RNA, partial sequence</a> | <a href="#">Bacillus zhangzhouensis</a>     | 2706      | 2706        | 100%        | 0.0     | 99.80%     | 1513     | <a href="#">NR_148786.1</a> |
| <input checked="" type="checkbox"/> | <a href="#">Bacillus altitudinis 41KF2b 16S ribosomal RNA, partial sequence</a>                 | <a href="#">Bacillus altitudinis 41KF2b</a> | 2689      | 2689        | 100%        | 0.0     | 99.59%     | 1506     | <a href="#">NR_042337.1</a> |
