# Supplementary material for: Biochemical and Thermodynamic Studies on a Novel Thermotolerant GH10 Xylanase from Bacillus safensis
Source: Biomolecules. 2022 Jun 6;12(6):790. doi: 10.3390/biom12060790 (PMC9221164; doi:10.3390/biom12060790)
Supplement: Supplementary file 1 [file biomolecules-12-00790-s001.zip]

Archive with 4 entries (4 files):
- supplementary Figure S1.pdf
- supplementary Figure S2.pdf
- supplementary Figure S3.pdf
- supplementary Figure S4.pdf
