# Supplementary figures and images for: Biochemical and Thermodynamic Studies on a Novel Thermotolerant GH10 Xylanase from Bacillus safensis
Source: MDPI journal article supplement (doi:10.3390/biom12060790), 2022-06-06

**Supplementary Figure S4**

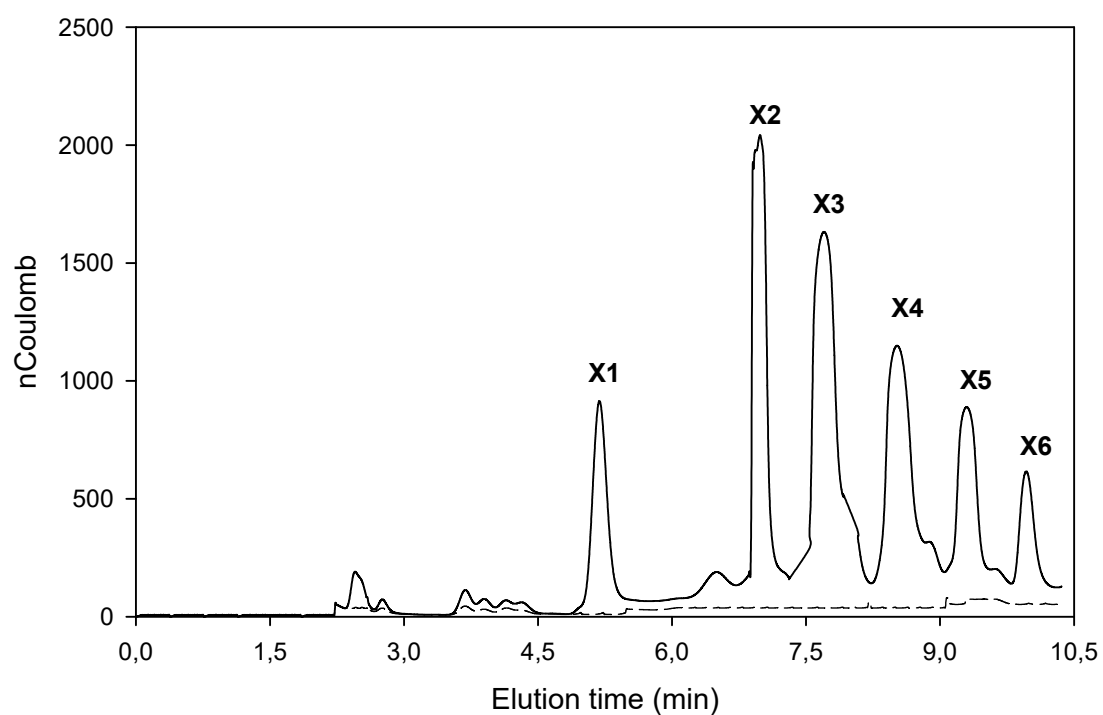

Supplement: s1 [file s1]

Supplementary Figure S2

Maps of the plasmids used in the present work.

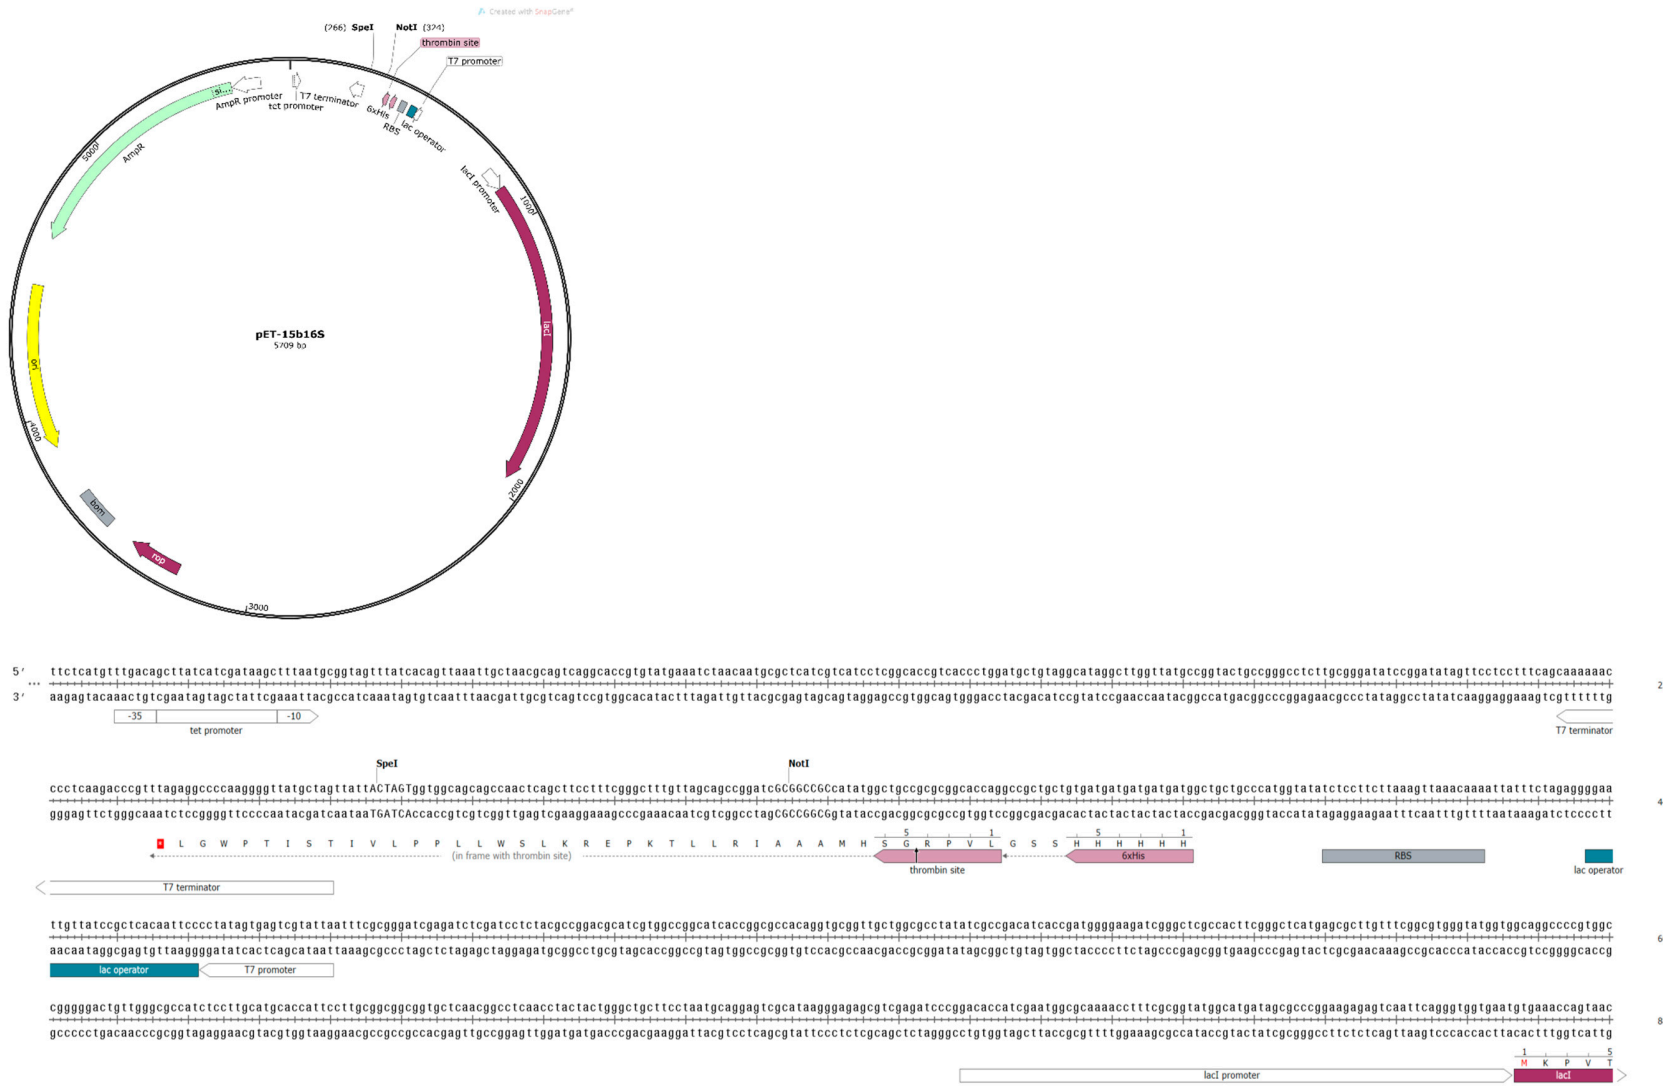

Supplement: s1 [file s1]
